# Supplementary material for: “I Climbed a Fig Tree, on an Apple Bashing Spree, Only Pears Fell Free”: Economic, Symbolic and Intrinsic Values of Plants Occurring in Slovenian Folk Songs Collected by K. Štrekelj (1895–1912)
Source: MDPI journal article supplement (doi:10.3390/plants11030458), 2022-02-07
Supplement: s1 [file s1]

# Supplementary Materials

**Table S2.** Table showing the number of plant citations for each plant taxon within each (sub)category.

| Scientific name                        | ENVIRONMENT | USE - HANDICRAFT | USE - DECORATION | USE - CONSUMPTION | USE - ANIMAL FEED | USE - OTHER | SYM - APPEARANCE | SYM - ECONOMIC STATUS | SYM - LOVE | SYM - RELIGIOUS | SYM - SADNESS, DEATH | SYM - OTHER |
|----------------------------------------|-------------|------------------|------------------|-------------------|-------------------|-------------|------------------|-----------------------|------------|-----------------|----------------------|-------------|
| <i>Abies alba</i>                      | 3           | 1                |                  |                   |                   |             |                  |                       |            | 1               |                      | 1           |
| <i>Acer campestre</i>                  |             |                  |                  |                   |                   |             |                  |                       |            |                 |                      | 1           |
| <i>Acer</i> spp.                       | 22          | 5                |                  |                   |                   | 1           |                  |                       | 4          |                 |                      | 2           |
| <i>Allium ampeloprasum</i>             |             |                  |                  | 1                 |                   |             |                  |                       |            |                 |                      | 1           |
| <i>Allium cepa</i>                     |             |                  |                  | 2                 |                   |             |                  |                       |            | 1               |                      | 3           |
| <i>Alnus</i> spp.                      | 2           | 3                |                  |                   |                   |             |                  |                       |            |                 |                      | 1           |
| <i>Artemisia</i> spp.                  |             |                  | 1                |                   |                   |             | 1                |                       |            |                 | 9                    | 1           |
| <i>Avena sativa</i>                    |             | 1                |                  | 16                | 1                 |             |                  | 1                     |            | 1               |                      |             |
| <i>Berberis vulgaris</i>               |             |                  |                  |                   |                   |             | 1                |                       |            |                 |                      |             |
| <i>Betula pendula</i>                  | 4           | 3                |                  |                   |                   |             | 2                |                       | 2          |                 |                      | 1           |
| <i>Boswellia sacra</i>                 |             |                  |                  |                   |                   |             |                  |                       |            | 8               |                      |             |
| <i>Brassica oleracea</i> var. capitata | 1           |                  |                  | 19                |                   |             | 1                | 14                    |            |                 |                      |             |
| <i>Brassica rapa</i> var. rapa         |             |                  |                  | 13                |                   |             | 2                | 3                     |            |                 |                      |             |
| <i>Buxus sempervirens</i>              | 4           | 1                |                  |                   |                   |             |                  |                       |            |                 | 1                    |             |
| <i>Cannabis sativa</i>                 | 2           | 1                |                  |                   |                   |             | 12               |                       |            |                 |                      | 4           |
| <i>Carpinus</i> spp.                   | 1           |                  |                  |                   |                   |             |                  |                       |            |                 |                      | 1           |
| <i>Ceratonia siliqua</i>               |             |                  |                  | 1                 |                   |             |                  |                       |            |                 |                      | 1           |
| <i>Citrus sinensis</i>                 | 1           |                  |                  | 4                 |                   |             |                  |                       | 1          |                 |                      |             |
| <i>Clematis vitalba</i>                |             | 1                |                  |                   |                   |             |                  |                       |            |                 |                      |             |
| <i>Coffea arabica</i>                  |             |                  |                  | 12                |                   | 1           |                  |                       | 3          |                 |                      |             |
| <i>Commiphora myrrha</i>               |             |                  |                  |                   |                   |             |                  |                       |            | 9               |                      |             |
| <i>Convallaria majalis</i>             | 1           |                  |                  |                   |                   |             |                  |                       |            |                 |                      | 1           |
| <i>Cornus</i> spp.                     | 2           |                  |                  |                   |                   |             |                  |                       |            | 1               |                      | 2           |
| <i>Corylus avellana</i>                | 6           | 2                |                  | 10                | 2                 | 2           |                  |                       | 2          | 1               |                      |             |
| <i>Daucus carota</i>                   | 1           |                  |                  | 21                |                   |             |                  | 1                     |            | 1               |                      | 1           |
| <i>Dianthus caryophyllus</i>           | 1           |                  | 40               |                   |                   |             | 19               |                       | 22         | 22              | 30                   | 4           |
| <i>Erica carnea</i>                    | 3           |                  |                  |                   |                   |             |                  |                       |            |                 |                      |             |
| <i>Erysimum cheiri</i>                 |             |                  | 1                |                   |                   |             |                  |                       |            |                 |                      |             |
| <i>Fagopyrum esculentum</i>            |             |                  |                  | 16                |                   | 2           | 1                | 5                     |            | 3               |                      | 1           |
| <i>Fagus sylvatica</i>                 | 23          | 1                |                  | 1                 | 7                 |             |                  | 1                     |            |                 |                      | 3           |
| <i>Ficus carica</i>                    |             |                  | 2                | 1                 |                   |             |                  |                       |            |                 |                      | 2           |

|                               |    |   |    |    |   |   |  |    |    |    |    |    |    |
|-------------------------------|----|---|----|----|---|---|--|----|----|----|----|----|----|
| <i>Foeniculum vulgare</i>     |    |   |    | 1  |   |   |  |    |    |    |    |    |    |
| <i>Fragaria</i> spp.          |    |   |    | 3  |   |   |  | 2  |    |    |    |    |    |
| <i>Fraxinus excelsior</i>     |    |   |    |    |   |   |  |    |    |    | 1  |    | 1  |
| <i>Gentiana verna</i>         |    |   |    |    |   |   |  |    |    |    | 1  |    |    |
| <i>Helianthus tuberosus</i>   |    |   |    | 1  |   |   |  | 1  |    |    |    |    |    |
| <i>Helichrysum</i> spp.       | 2  |   |    |    |   |   |  |    |    |    |    |    |    |
| <i>Hordeum vulgare</i>        |    | 1 |    | 8  |   | 1 |  | 1  | 2  |    |    |    |    |
| <i>Juglans regia</i>          | 2  | 1 |    | 3  |   |   |  |    | 2  |    |    |    | 6  |
| <i>Juniperus communis</i>     | 2  | 2 |    | 1  | 1 |   |  |    | 1  |    | 1  |    |    |
| <i>Lactuca sativa</i>         |    |   |    | 12 |   |   |  |    | 3  |    |    |    |    |
| <i>Laurus nobilis</i>         | 1  |   |    | 3  |   |   |  | 1  |    |    | 1  |    | 1  |
| <i>Lens culinaris</i>         |    |   |    | 5  | 1 |   |  | 1  | 2  |    |    |    | 1  |
| <i>Lilium candidum</i>        | 2  |   | 13 |    |   |   |  | 9  |    | 1  | 72 | 17 | 2  |
| <i>Linum usitatissimum</i>    | 1  | 1 |    | 1  |   |   |  |    |    |    |    |    |    |
| <i>Malus domestica</i>        | 16 | 1 | 1  | 9  | 6 | 8 |  | 9  | 3  | 12 | 14 | 2  | 8  |
| <i>Morus</i> spp.             | 2  |   |    |    |   |   |  |    |    |    |    |    |    |
| <i>Nicotiana tabacum</i>      |    |   |    | 30 |   |   |  |    | 13 |    |    |    |    |
| <i>Ocimum basilicum</i>       | 1  |   | 5  |    |   |   |  |    |    |    | 5  |    |    |
| <i>Olea europaea</i>          |    |   |    |    |   |   |  |    |    |    | 2  |    |    |
| <i>Origanum majorana</i>      | 1  |   |    |    |   |   |  |    |    | 4  | 9  | 1  | 10 |
| <i>Panicum miliaceum</i>      |    |   |    | 4  | 6 |   |  |    | 1  |    | 1  |    |    |
| <i>Papaver rhoeas</i>         |    |   |    |    |   |   |  | 1  |    |    |    |    |    |
| <i>Papaver somniferum</i>     |    |   |    |    |   |   |  | 6  |    |    | 1  |    | 1  |
| <i>Papaver</i> spp.           |    |   | 1  |    |   |   |  | 3  |    | 1  |    |    | 1  |
| <i>Pelargonium radens</i>     |    |   | 1  |    |   |   |  |    |    | 6  | 3  | 1  |    |
| <i>Pelargonium</i> spp.       |    |   | 1  |    |   |   |  |    |    |    |    | 1  |    |
| <i>Phaseolus vulgaris</i>     |    |   |    | 12 |   |   |  |    | 9  |    |    |    |    |
| <i>Picea abies</i>            | 6  | 8 |    |    |   |   |  |    |    | 1  |    | 2  | 8  |
| <i>Pinus</i> spp.             | 19 |   |    |    |   |   |  |    |    | 4  |    |    |    |
| <i>Piper nigrum</i>           |    |   |    |    |   | 1 |  |    |    |    |    |    |    |
| <i>Pisum sativum</i>          |    |   |    | 3  |   |   |  | 1  |    |    |    |    |    |
| <i>Populus</i> spp.           | 1  |   |    |    |   |   |  |    |    |    |    |    |    |
| <i>Populus tremula</i>        |    |   |    |    |   |   |  |    |    |    |    |    | 1  |
| <i>Prunus avium</i>           | 3  |   |    | 6  |   |   |  | 1  |    | 1  |    |    | 1  |
| <i>Prunus cerasus</i>         |    |   | 1  | 2  |   |   |  |    |    | 3  |    |    | 1  |
| <i>Prunus domestica</i>       | 2  |   | 1  |    |   |   |  |    |    |    | 1  | 1  |    |
| <i>Prunus persica</i>         |    |   |    | 1  |   |   |  |    |    |    |    |    |    |
| <i>Prunus spinosa</i>         | 2  |   |    |    |   |   |  | 2  |    | 1  |    | 2  |    |
| <i>Pyrus communis</i>         | 10 |   |    | 8  |   | 3 |  | 2  | 2  | 1  | 3  |    | 7  |
| <i>Quercus</i> spp.           | 12 | 1 |    |    | 4 |   |  | 3  |    |    |    |    | 5  |
| <i>Raphanus sativus</i>       |    |   |    | 3  |   |   |  |    |    |    |    |    | 1  |
| <i>Rosa</i> spp.              | 9  |   | 7  |    |   |   |  | 8  |    | 4  | 63 | 6  | 5  |
| <i>Rosmarinus officinalis</i> | 1  |   | 39 | 1  |   | 2 |  | 13 |    | 59 | 44 | 36 | 5  |

|                                   |     |    |     |     |    |    |    |    |      |     |     |     |
|-----------------------------------|-----|----|-----|-----|----|----|----|----|------|-----|-----|-----|
| <i>Rumex obtusifolius</i>         |     |    |     |     |    | 1  |    |    |      |     |     |     |
| <i>Salix</i> spp.                 | 5   | 2  |     |     |    |    |    |    | 1    |     | 1   |     |
| <i>Salvia officinalis</i>         |     |    |     |     |    |    |    |    |      | 1   |     |     |
| <i>Sambucus nigra</i>             |     | 2  |     |     |    | 1  |    |    |      |     |     |     |
| <i>Santolina chamaecyparissus</i> |     |    | 27  |     |    | 4  |    | 2  |      | 25  |     |     |
| <i>Secale cereale</i>             |     |    |     | 3   | 2  |    | 2  |    |      |     |     |     |
| <i>Solanum tuberosum</i>          |     |    |     | 13  |    |    |    |    |      |     | 1   |     |
| <i>Sphagnum</i> spp.              |     |    |     |     | 1  |    |    |    |      |     |     |     |
| <i>Taraxacum officinale</i>       |     |    |     |     |    | 1  |    |    |      |     |     |     |
| <i>Tilia</i> spp.                 | 88  | 3  |     | 1   | 3  |    |    | 2  | 4    |     | 4   |     |
| <i>Trifolium</i> spp.             | 11  |    |     | 1   | 8  |    |    |    | 1    | 8   |     |     |
| <i>Triticum aestivum</i>          | 9   | 1  | 1   | 131 | 19 |    | 12 | 2  | 53   |     |     |     |
| <i>Ulmus</i> spp.                 |     |    |     |     |    |    |    |    |      |     | 1   |     |
| Unclassified fern                 | 3   |    |     | 3   | 5  |    | 4  | 3  | 3    | 6   | 5   |     |
| Unclassified moss                 | 3   |    |     |     |    | 1  |    |    |      |     |     |     |
| Unclassified Poaceae              | 8   | 1  |     | 2   | 2  |    | 5  |    | 25   |     | 1   |     |
| Unidentified seed plant           |     |    |     | 1   | 1  |    |    |    | 1    |     |     |     |
| <i>Urtica dioica</i>              | 2   |    | 2   |     |    |    |    |    | 2    | 6   | 5   |     |
| <i>Vicia faba</i>                 |     |    |     | 5   |    |    | 1  |    |      |     |     |     |
| <i>Vinca minor</i>                |     |    |     |     |    |    |    |    | 1    |     |     |     |
| <i>Viola</i> spp.                 | 2   |    | 7   |     |    |    |    | 3  | 1    | 7   | 2   |     |
| <i>Vitis vinifera</i>             | 17  |    | 2   | 152 |    | 8  | 12 | 13 | 104  | 1   | 2   |     |
| <i>Zea mays</i>                   |     |    |     | 2   | 1  |    |    |    |      |     |     |     |
| <i>Zingiber officinale</i>        |     |    |     | 1   |    |    |    |    |      |     |     |     |
| Sum subcategory                   |     | 28 | 152 | 497 | 58 | 31 | 99 | 82 | 151  | 453 | 155 | 101 |
| Sum category                      | 281 |    |     | 766 |    |    |    |    | 1041 |     |     |     |
| Total species                     | 39  | 15 | 18  | 41  | 12 | 12 | 24 | 20 | 23   | 31  | 20  | 36  |
